# Supplementary material
Source: publisher figshare collection journal article supplement (https://tandf.figshare.com/ndownloader/files/20114501)
Supplement: Supplementary file 1 [file 20114501]

**Characterization of the processing conditions upon textural profile analysis (TPA) parameters of processed cheese using near-infrared hyperspectral imaging**

Jiajia Shan, Yituo Zhang, Jing Liang, Xue Wang*

School of Ocean Science and Technology, Dalian University of Technology, Panjin 124221 China.

Corresponding author: Xue Wang Email address: wangxue@dlut.edu.cn

**Table of Content**

Figure S1 The tendency of TPA parameters obtained from different proportion of two types of cheeses (A): hardness and adhesiveness; (B): cohesiveness and springiness; (C): gumminess and chewiness.

Figure S2 The tendency of TPA parameters obtained from different content of citric acid (A): hardness and adhesiveness; (B): cohesiveness and springiness; (C): gumminess and chewiness.

Figure S3 The tendency of TPA parameters obtained from different heating temperature (A): hardness and adhesiveness; (B): cohesiveness and springiness; (C): gumminess and chewiness.

Figure S4 The tendency of TPA parameters obtained from different content of water (A): hardness and adhesiveness; (B): cohesiveness and springiness; (C): gumminess and chewiness.

Figure S5 The tendency of TPA parameters obtained from different holding time (A): hardness and adhesiveness; (B): cohesiveness and springiness; (C): gumminess and chewiness.


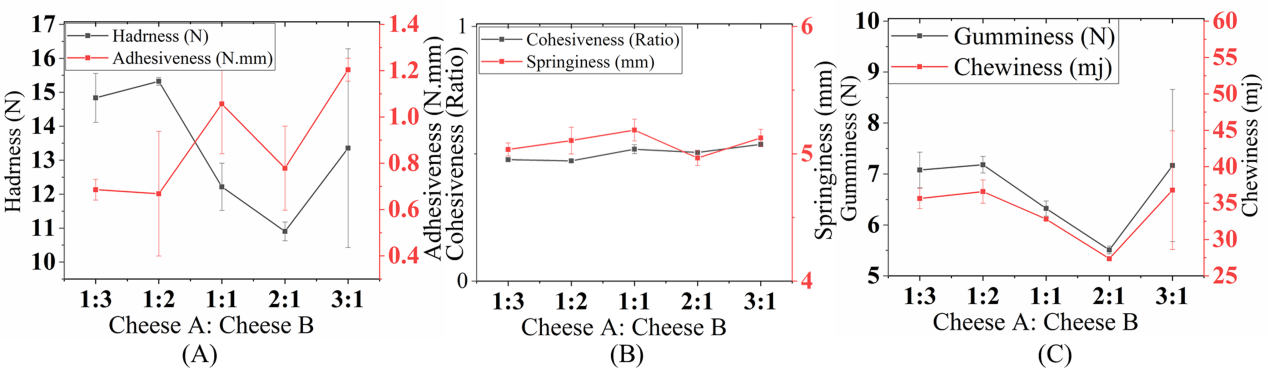


Figure S1 The tendency of TPA parameters obtained from different proportion of two types of cheeses (A): hardness and adhesiveness; (B): cohesiveness and springiness; (C): gumminess and chewiness.


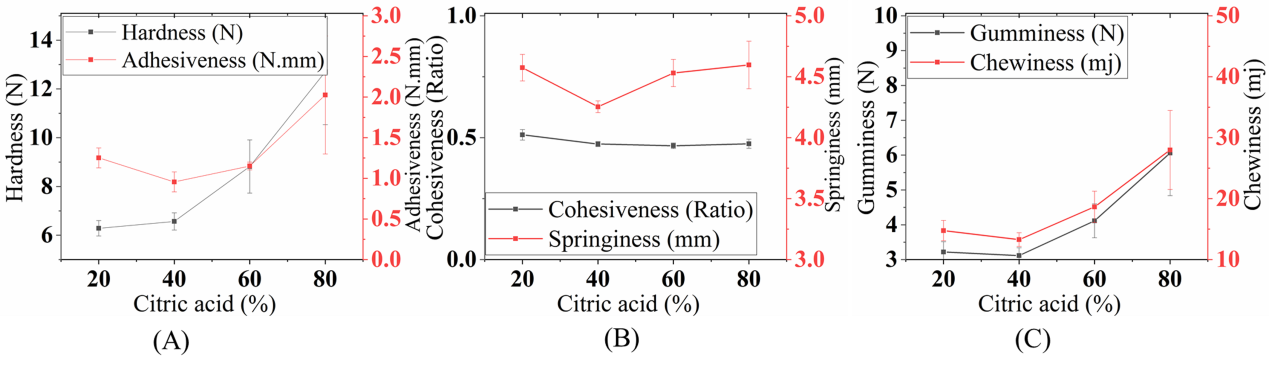


Figure S2 The tendency of TPA parameters obtained from different content of citric acid (A): hardness and adhesiveness; (B): cohesiveness and springiness; (C): gumminess and chewiness.


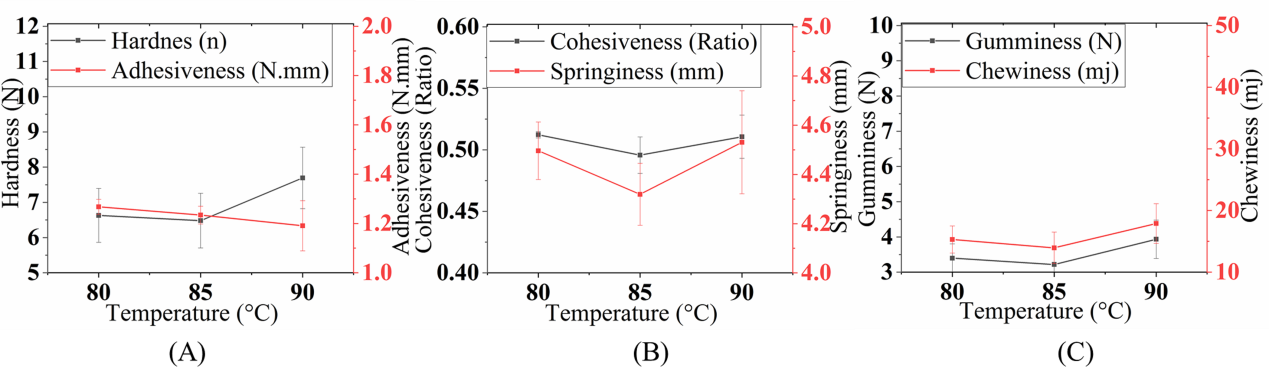


Figure S3 The tendency of TPA parameters obtained from different heating temperature (A): hardness and adhesiveness; (B): cohesiveness and springiness; (C): gumminess and chewiness.


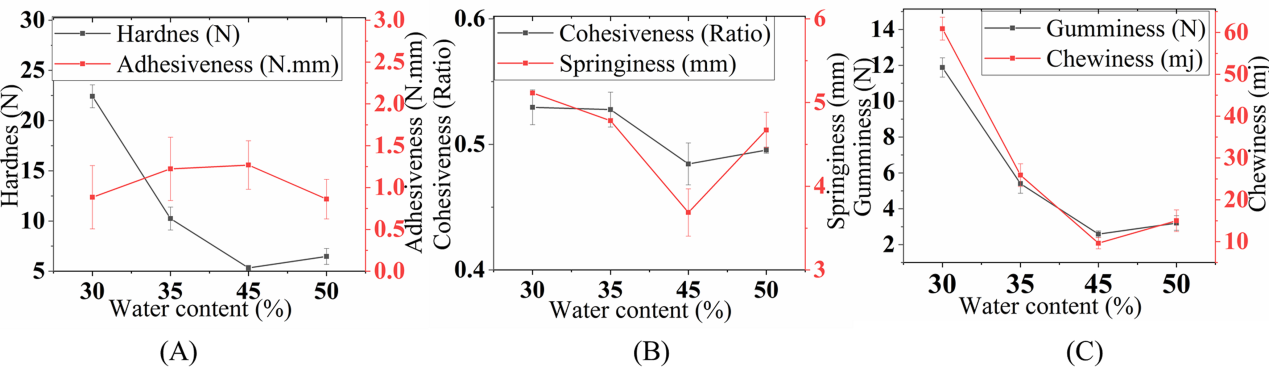


Figure S4 The tendency of TPA parameters obtained from different content of water (A): hardness and adhesiveness; (B): cohesiveness and springiness; (C): gumminess and chewiness.


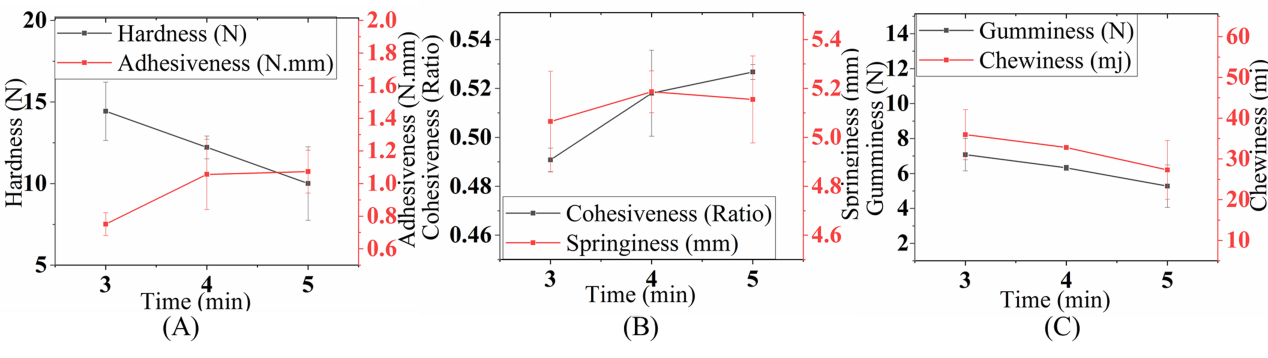


Figure S5 The tendency of TPA parameters obtained from different holding time (A): hardness and adhesiveness; (B): cohesiveness and springiness; (C): gumminess and chewiness.
